# Supplementary material for: Feasibility and clinical utility of comprehensive genomic profiling of hematological malignancies
Source: PubMed Central journal article supplement — Cancer Sci. 2022 Jun 17;113(8):2763–77. doi: 10.1111/cas.15427 (PMC9357666; doi:10.1111/cas.15427), 2022-06-17
Supplement: CAS-113-2763-s001.pdf [file CAS-113-2763-s001.pdf]

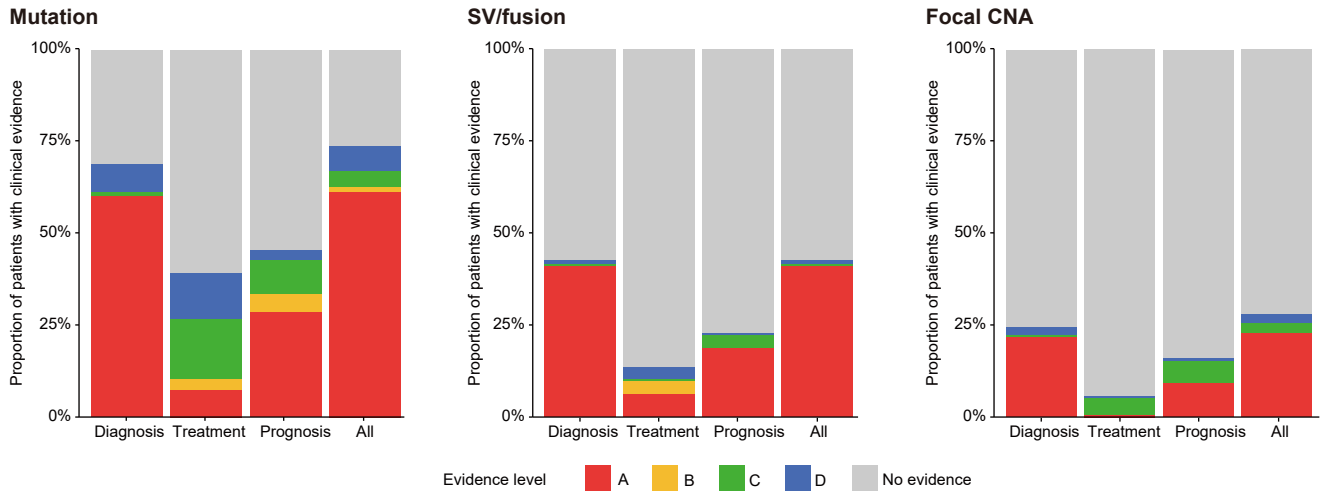

**Supplementary Figure 3 Clinical utility of comprehensive genomic profiling in hematological malignancies.**

Proportion of patients harboring at least one somatic alteration with indicated clinical evidence level according to the JSH Genome Guideline for mutations, SVs/fusions, and focal CNAs in all patients.
