# Supplementary material for: Feasibility and clinical utility of comprehensive genomic profiling of hematological malignancies
Source: PubMed Central journal article supplement — Cancer Sci. 2022 Jun 17;113(8):2763–77. doi: 10.1111/cas.15427 (PMC9357666; doi:10.1111/cas.15427), 2022-06-17
Supplement: CAS-113-2763-s002.pdf [file CAS-113-2763-s002.pdf]

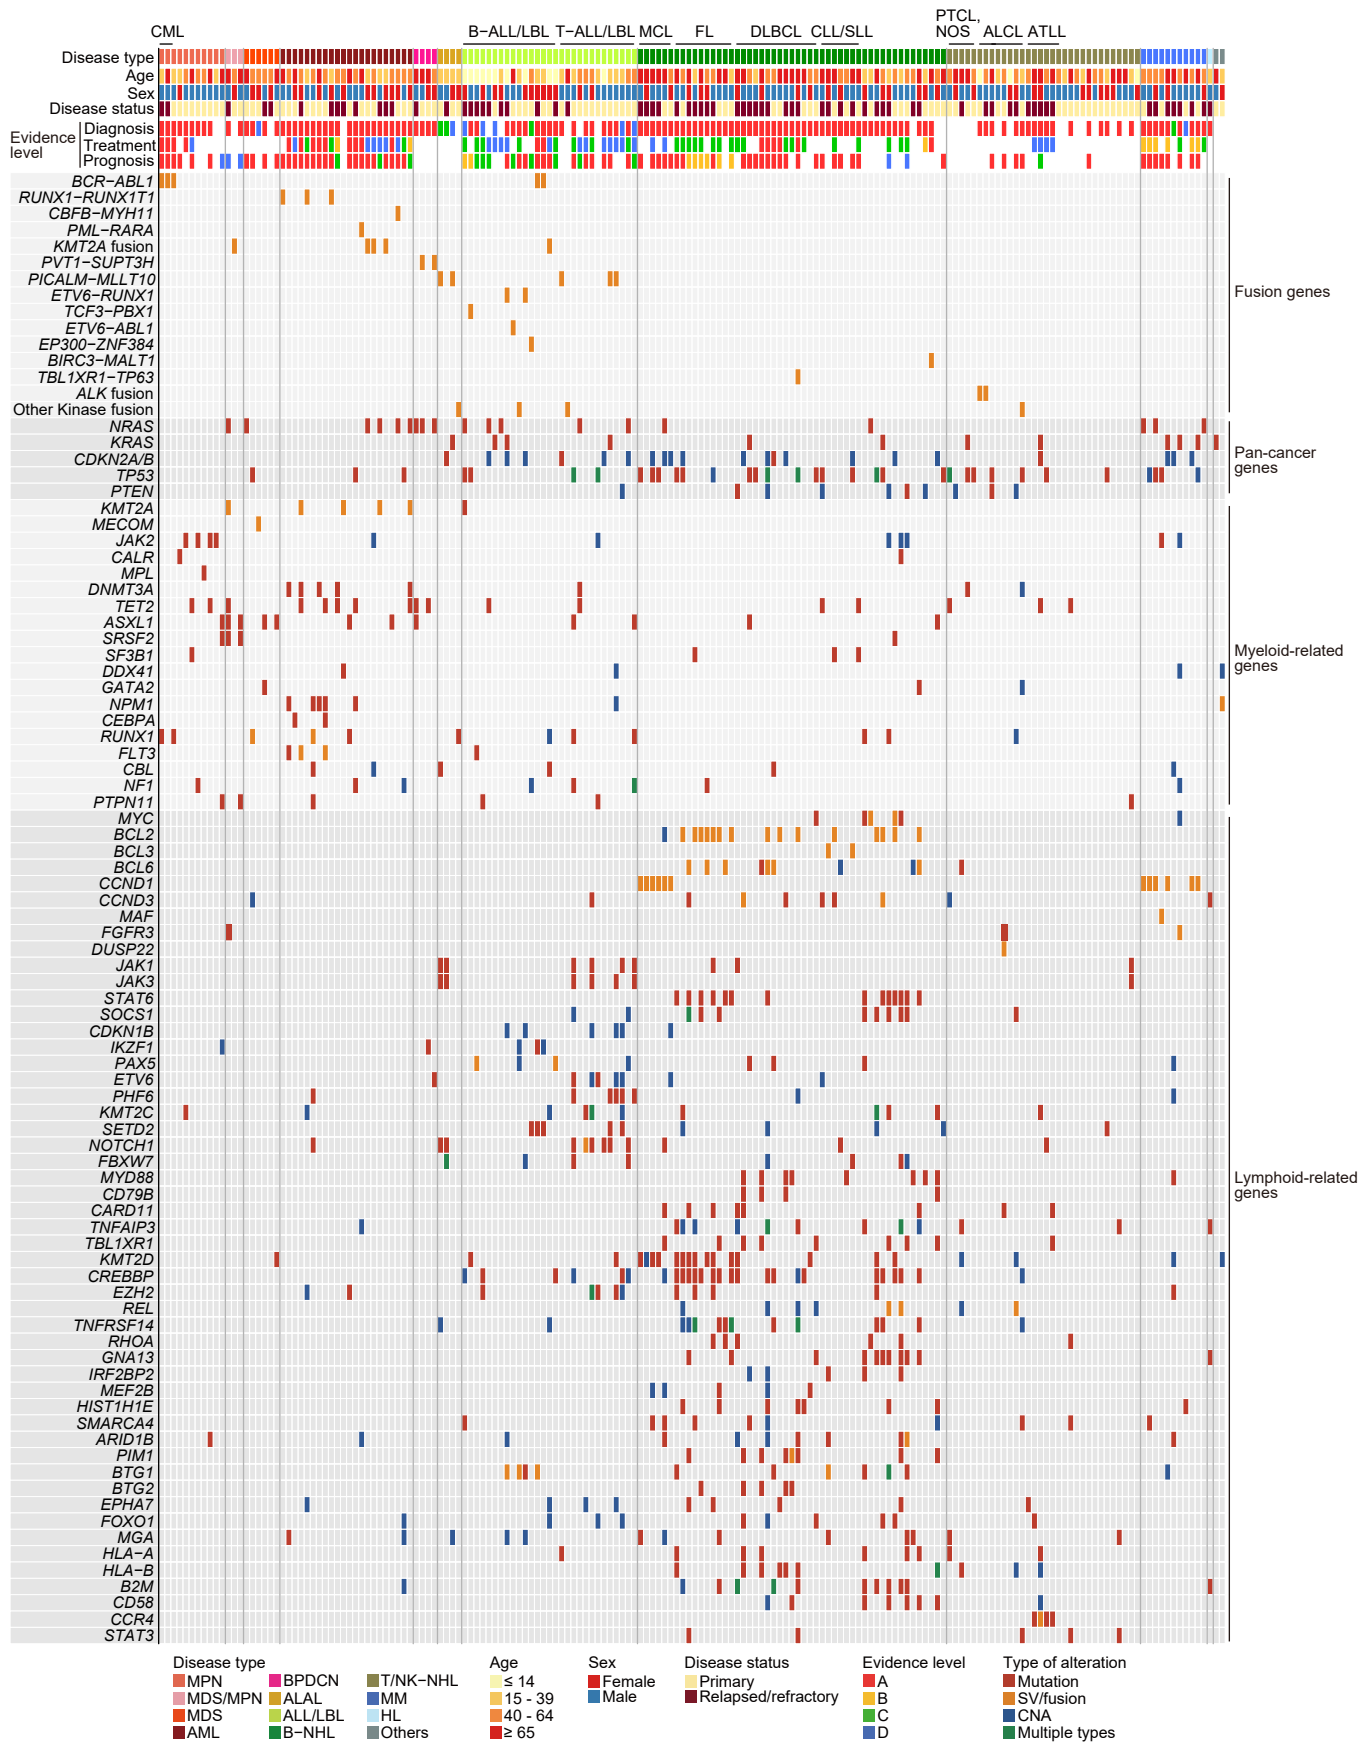

**Supplementary Figure 2 Landscape of somatic alterations revealed by comprehensive genomic profiling.**

A heatmap showing the distribution of somatic alterations in 90 representative driver genes according to alteration type in 176 patients. Disease type, disease status, age, sex, and the highest clinical evidence level assigned to each patient according to the JSH Genome Guideline are also depicted. Type of alteration is classified in the same manner as in **Figure 2B**.
