# Supplementary material for: Feasibility and clinical utility of comprehensive genomic profiling of hematological malignancies
Source: PubMed Central journal article supplement — Cancer Sci. 2022 Jun 17;113(8):2763–77. doi: 10.1111/cas.15427 (PMC9357666; doi:10.1111/cas.15427), 2022-06-17
Supplement: CAS-113-2763-s005.pdf [file CAS-113-2763-s005.pdf]

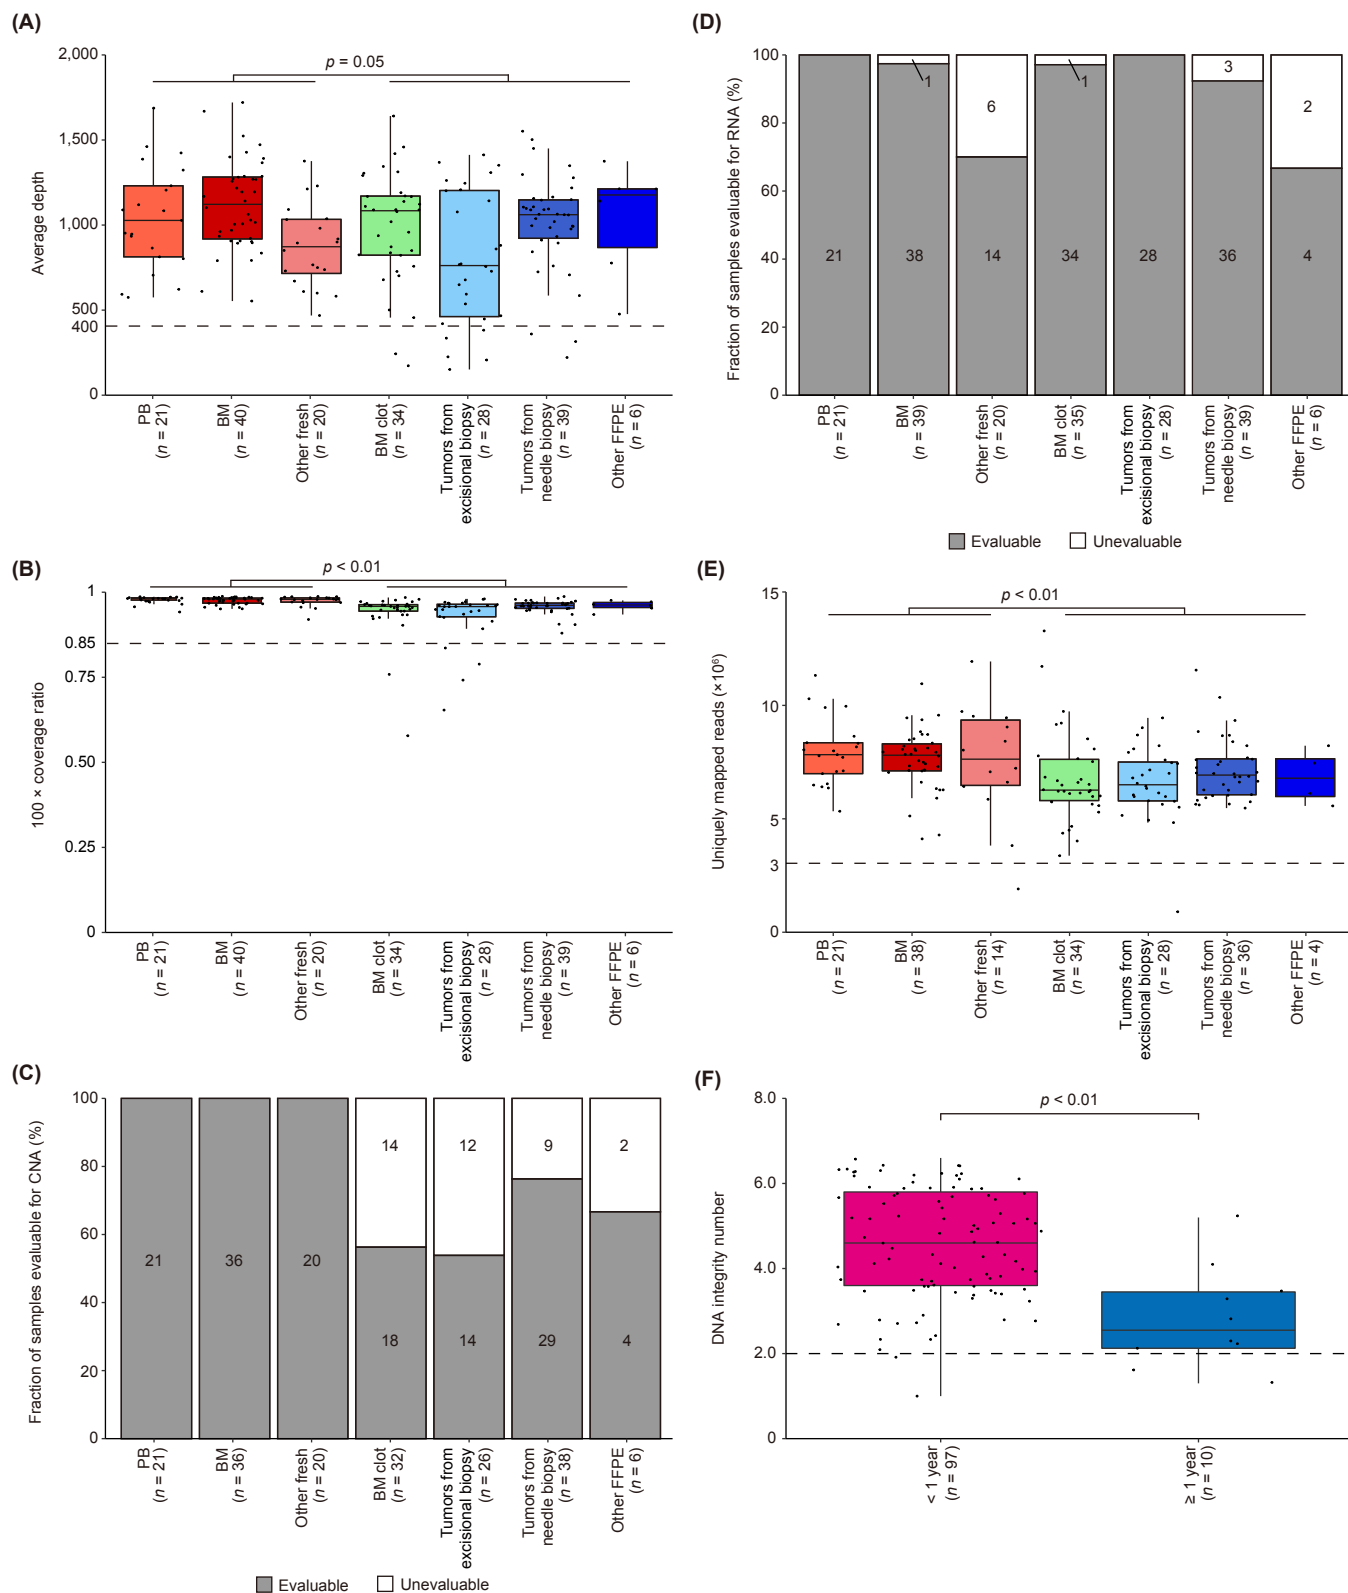

**Supplementary Figure 1 Quality of sequencing in this study.**

**A and B**, Average read depth (**A**) and fraction of bases covered by at least 100× sequencing reads (**B**) stratified by tissue and specimen type in targeted DNA-seq. **C**, Proportion of specimens evaluable by copy number analysis stratified by tissue and specimen type in 179 specimens excluding 9 collected after allogeneic HSCT. **D**, Proportion of specimens evaluable by targeted RNA-seq stratified by tissue and specimen type in 188 specimens. **E**, Number of uniquely mapped reads stratified by tissue and specimen type in targeted RNA-seq. **F**, Effect of storage duration from specimen collection on DNA integrity number for FFPE specimens ( $n = 108$ ). Two-sided Welch's t-test. **A-F**,  $n$  denotes number of available specimens. **A, B, E and F**, Box plots show medians (lines), IQRs (boxes), and  $\pm 1.5 \times$  IQR (whiskers). **A, B and E**, Fresh and FFPE specimens were compared with two-sided Welch's t-test.
